# Supplementary material
Source: Research Square preprint supplement (doi:10.21203/rs.3.rs-9275274/v1)
Supplement: Supplementary file 1 [file c067333cd8e3a30b9d2281d9.pdf]

Article title: Nanocomposite Coated  
Carbon-MEMS-Derived Glassy Carbon Electrode  
for Acetone Sensing.

Journal name: SPRINGER- Microsystem  
Technologies (Extended version of  
Micro/Nanoelectronics Devices, Circuits and  
Systems (MNDCS-2026)).

Anto Manuel<sup>1,2</sup> [0009-0009-2438-4567],  
Madhukumar S<sup>2</sup> [0000-0002-2422-5891], and  
Bidhan Pramanick<sup>1,3\*</sup> [0000-0001-9792-2383]

<sup>1</sup>School of Electrical Sciences, Indian Institute of Technology (IIT) Goa,  
Farmagudi, Ponda, 403401, Goa, India.

<sup>2</sup>Department of Biomedical Engineering, Rajadhani Institute of  
Engineering and Technology, Trivandrum, 695102, Kerala, India.

<sup>3</sup>Center of Excellence in Particulates, Colloids and Interfaces, Indian  
Institute of Technology (IIT) Goa, Farmagudi, Ponda, 403401, Goa,  
India.

bidhan@iitgoa.ac.in, anto20242201@iitgoa.ac.in.

**Supplementary Materials (SM)**

## 1 Supplementary part of Section 3.1 Materials

**SM Table 1:** Details of Materials and Sources

| Sl. No. | Material                                                | Obtained from                                            |
|---------|---------------------------------------------------------|----------------------------------------------------------|
| 1       | Silicon Wafer ( $\langle 100 \rangle$ , p-type, 2-inch) | Siltronic, Germany                                       |
| 2       | SiO <sub>2</sub> Layer                                  | Thermal oxidation (Dry–Wet–Dry: 20–120–20 min at 1000°C) |
| 3       | SU-8 2010 (Negative PR)                                 | MicroChem Corp., USA                                     |
| 4       | Silver Conductive Paste (Code 842)                      | M.G. Chemicals, Canada                                   |
| 5       | Ethylene Glycol (CAS: 107-21-1)                         | Avra Synthesis Pvt. Ltd., India                          |
| 6       | TiO <sub>2</sub> Nanopowder ( $\geq 99.5\%$ )           | Sigma-Aldrich, China                                     |
| 7       | ZnO (99.999% purity)                                    | Sigma-Aldrich, China                                     |
| 8       | Acetone (C <sub>3</sub> H <sub>6</sub> O)               | SimSon PharmaChem, Mumbai, India                         |
| 9       | Carbon Nanotubes (CNTs)                                 | Sigma-Aldrich, USA                                       |

## 2 Supplementary part of Section 3.3 Fabrication of GC–IDE

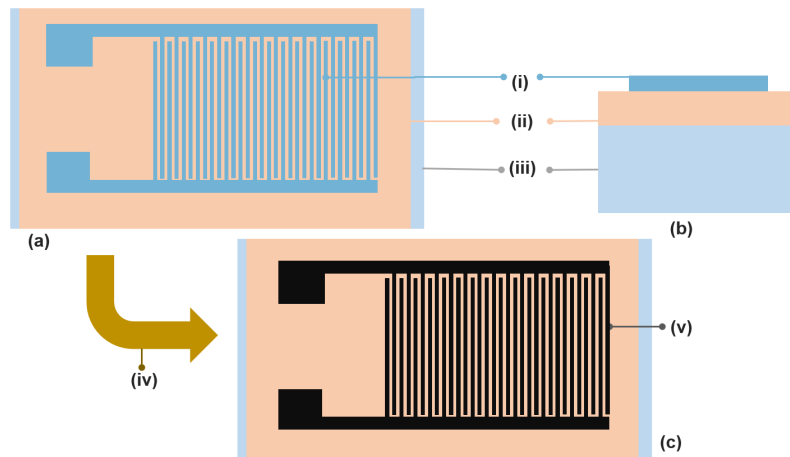

**SMFig. 1:** The SU-8 PR structure transition to a GC–IDE is shown graphically in (a) the SU8 PR structure created by the photolithography process following the spin coat of PR, (b) a cross-sectional view of (a), and (c) the GC–IDE structure developed following the pyrolysis process that converted the SU-8 PR structure to GC–IDE ((i): SU8 PR Structure, (ii): SiO<sub>2</sub> layer, (iii): Si Substrate, (iv): Pyrolysis Process at 1000°C, (v): GC–IDE).

Fig. 1 illustrates the transition of an SU-8 PR structure into a GC-IDE through the pyrolysis process. The comprehensive process described in Ref [?] was followed in order to convert SU-8 PR into GC-IDE.

A 2-inch  $\langle 100 \rangle$  p-type silicon wafer was used as the substrate for IDE fabrication.

During this high-temperature treatment, the SU-8 PR polymer undergoes thermal decomposition and carbonization, resulting in the formation of a GC-IDE, as shown in Fig. 1(c).

### 3 Supplementary part of Section 4.3 Interaction of Nanocomposite with Acetone

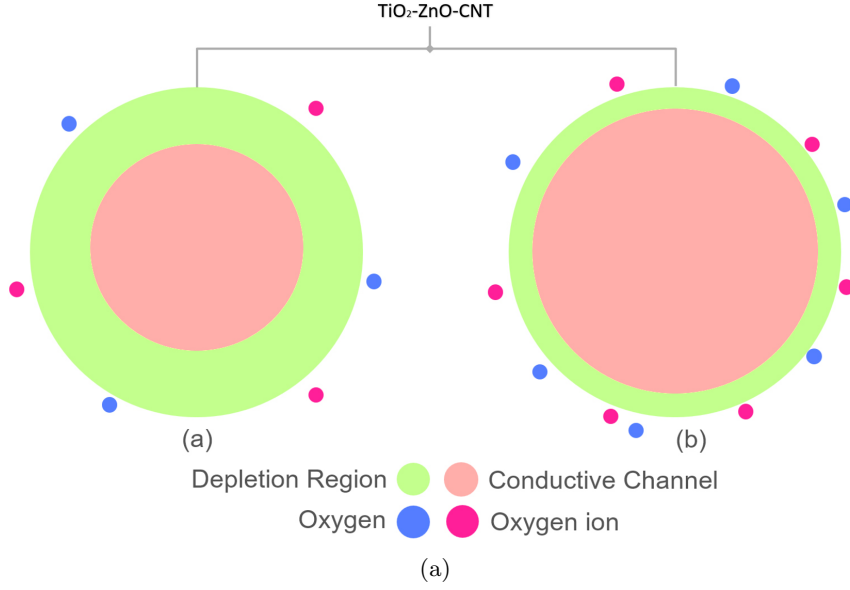

**SMFig. 2:** Schematics of the electrical structures of the  $\text{TiO}_2\text{-ZnO-CNT}$  (a) In the presence of ((a)Air, (b)Acetone).

**SM Table 2:** Results obtained using Parametric Analyzer: Voltage, current and resistance change in the exposure and absence of acetone (SL1 and SL2) (*Supplementary part of Section 4.4 Results Obtained with the aid of Parametric Analyzer, Fig. 8a, 8b, 9a, 9b, 10a and 10b (CAA: Current in the absence of Acetone, RAA: Resistance in the absence of Acetone, CPA: Current in the presence of Acetone, RPA: Resistance in the presence of Acetone).*)

| Voltage (V) | Figure 7a |                  |         | Figure 7b            |          |                      | Figure 8a and 8b |                      |          | Figure 8c and 8d     |          |                      |
|-------------|-----------|------------------|---------|----------------------|----------|----------------------|------------------|----------------------|----------|----------------------|----------|----------------------|
|             | CAA (A)   | RAA ( $\Omega$ ) | CPA (A) | RPA ( $\Omega$ ) (A) | Time (s) | RPA ( $\Omega$ ) (A) | Time (s)         | RPA ( $\Omega$ ) (A) | Time (s) | RPA ( $\Omega$ ) (A) | Time (s) | RPA ( $\Omega$ ) (A) |
| 1.0         | 1.0E-9    | 1.05E9           | 4.3E-7  | 2.31E6               | 1        | 1.81E6               | 1                | 1.81E6               | 1        | 1.33E6               | 1        | 1.33E6               |
| 1.1         | 1.4E-9    | 8.10E8           | 5.2E-7  | 2.11E6               | 7        | 2.06E6               | 7                | 2.06E6               | 8        | 8.58E5               | 8        | 8.58E5               |
| 1.2         | 1.2E-9    | 1.04E9           | 6.0E-7  | 2.00E6               | 13       | 2.28E6               | 13               | 2.28E6               | 15       | 8.69E5               | 15       | 8.69E5               |
| 1.3         | 1.3E-9    | 9.50E8           | 6.8E-7  | 1.91E6               | 19       | 2.33E6               | 19               | 2.33E6               | 23       | 7.72E7               | 23       | 7.72E7               |
| 1.4         | 1.4E-9    | 9.85E8           | 7.6E-7  | 1.84E6               | 25       | 2.69E6               | 25               | 2.69E6               | 30       | 2.15E8               | 30       | 2.15E8               |
| 1.5         | 2.1E-9    | 7.20E8           | 8.2E-7  | 1.83E6               | 31       | 1.01E7               | 31               | 1.01E7               | 37       | 3.76E8               | 37       | 3.76E8               |
| 1.6         | 1.6E-9    | 9.70E8           | 9.1E-7  | 1.76E6               | 37       | 3.21E7               | 37               | 3.21E7               | 47       | 4.96E8               | 47       | 4.96E8               |
| 1.7         | 2.7E-9    | 6.30E8           | 9.9E-7  | 1.70E6               | 44       | 7.87E7               | 44               | 7.87E7               | 60       | 5.05E8               | 60       | 5.05E8               |
| 1.8         | 1.8E-9    | 9.55E8           | 1.10E-6 | 1.64E6               | 51       | 9.97E7               | 51               | 9.97E7               | 72       | 5.19E8               | 72       | 5.19E8               |
| 1.9         | 2.6E-9    | 7.30E8           | 1.18E-6 | 1.61E6               | 57       | 2.16E8               | 57               | 2.16E8               | 85       | 5.26E8               | 85       | 5.26E8               |
| 2.0         | 2.0E-9    | 9.90E8           | 1.28E-6 | 1.56E6               | 63       | 2.66E8               | 63               | 2.66E8               | 98       | 5.30E8               | 98       | 5.30E8               |
| 2.1         | 2.9E-9    | 7.40E8           | 1.42E-6 | 1.48E6               | 69       | 3.78E8               | 69               | 3.78E8               | 106      | 5.31E8               | 106      | 5.31E8               |
| 2.2         | 2.2E-9    | 9.80E8           | 1.56E-6 | 1.41E6               | 75       | 3.97E8               | 75               | 3.97E8               | 115      | 5.33E8               | 115      | 5.33E8               |
| 2.3         | 3.4E-9    | 6.60E8           | 1.67E-6 | 1.38E6               | 81       | 4.98E8               | 81               | 4.98E8               | 131      | 5.34E8               | 131      | 5.34E8               |
| 2.4         | 2.5E-9    | 9.20E8           | 1.78E-6 | 1.35E6               | 88       | 5.11E8               | 88               | 5.11E8               | 144      | 5.38E8               | 144      | 5.38E8               |
| 2.5         | 4.0E-9    | 6.25E8           | 1.90E-6 | 1.32E6               | 93       | 5.21E8               | 93               | 5.21E8               | —        | —                    | —        | —                    |
| 2.6         | 4.1E-9    | 6.50E8           | 2.04E-6 | 1.28E6               | 98       | 5.41E8               | 98               | 5.41E8               | —        | —                    | —        | —                    |
| 2.7         | 4.2E-9    | 6.40E8           | 2.18E-6 | 1.24E6               | 105      | 5.50E8               | 105              | 5.50E8               | —        | —                    | —        | —                    |
| 2.8         | 4.4E-9    | 6.40E8           | 2.32E-6 | 1.21E6               | 112      | 5.77E8               | 112              | 5.77E8               | —        | —                    | —        | —                    |
| 2.9         | 4.6E-9    | 6.30E8           | 2.44E-6 | 1.19E6               | 119      | 6.07E8               | 119              | 6.07E8               | —        | —                    | —        | —                    |
| 3.0         | 4.8E-9    | 6.25E8           | 2.58E-6 | 1.16E6               | 128      | 6.31E8               | 128              | 6.31E8               | —        | —                    | —        | —                    |
| 3.1         | 5.0E-9    | 6.20E8           | 2.73E-6 | 1.14E6               | 136      | 6.42E8               | 136              | 6.42E8               | —        | —                    | —        | —                    |
| 3.2         | 5.2E-9    | 6.15E8           | 2.88E-6 | 1.11E6               | 144      | 6.51E8               | 144              | 6.51E8               | —        | —                    | —        | —                    |
| 3.3         | 5.3E-9    | 6.25E8           | 3.02E-6 | 1.09E6               | 153      | 6.61E8               | 153              | 6.61E8               | —        | —                    | —        | —                    |
| 3.4         | 5.6E-9    | 6.10E8           | 3.18E-6 | 1.07E6               | 161      | 6.77E8               | 161              | 6.77E8               | —        | —                    | —        | —                    |
| 3.5         | 5.8E-9    | 6.05E8           | 3.33E-6 | 1.05E6               | 174      | 6.98E8               | 174              | 6.98E8               | —        | —                    | —        | —                    |
| 3.6         | 6.1E-9    | 5.90E8           | 3.45E-6 | 1.04E6               | 182      | 7.08E8               | 182              | 7.08E8               | —        | —                    | —        | —                    |
| 3.7         | 6.2E-9    | 5.95E8           | 3.62E-6 | 1.02E6               | 191      | 7.25E8               | 191              | 7.25E8               | —        | —                    | —        | —                    |
| 3.8         | 6.4E-9    | 5.90E8           | 3.76E-6 | 1.01E6               | 200      | 7.42E8               | 200              | 7.42E8               | —        | —                    | —        | —                    |
| 3.9         | 6.6E-9    | 5.85E8           | 3.93E-6 | 9.90E5               | 212      | 7.60E8               | 212              | 7.60E8               | —        | —                    | —        | —                    |
| 4.0         | 6.9E-9    | 5.80E8           | 4.10E-6 | 9.80E5               | 218      | 7.69E8               | 218              | 7.69E8               | —        | —                    | —        | —                    |
| 4.1         | 7.2E-9    | 5.70E8           | 4.26E-6 | 9.60E5               | 228      | 7.69E8               | 228              | 7.69E8               | —        | —                    | —        | —                    |
| 4.2         | 7.5E-9    | 5.60E8           | 4.42E-6 | 9.50E5               | —        | —                    | —                | —                    | —        | —                    | —        | —                    |
| 4.3         | 7.7E-9    | 5.65E8           | 4.57E-6 | 9.40E5               | —        | —                    | —                | —                    | —        | —                    | —        | —                    |
| 4.4         | 7.8E-9    | 5.60E8           | 4.76E-6 | 9.20E5               | —        | —                    | —                | —                    | —        | —                    | —        | —                    |
| 4.5         | 8.1E-9    | 5.55E8           | 4.94E-6 | 9.10E5               | —        | —                    | —                | —                    | —        | —                    | —        | —                    |
| 4.6         | 8.3E-9    | 5.55E8           | 5.08E-6 | 9.00E5               | —        | —                    | —                | —                    | —        | —                    | —        | —                    |
| 4.7         | 8.5E-9    | 5.50E8           | 5.26E-6 | 8.90E5               | —        | —                    | —                | —                    | —        | —                    | —        | —                    |
| 4.8         | 8.7E-9    | 5.50E8           | 5.42E-6 | 8.80E5               | —        | —                    | —                | —                    | —        | —                    | —        | —                    |
| 4.9         | 8.9E-9    | 5.45E8           | 5.59E-6 | 8.70E5               | —        | —                    | —                | —                    | —        | —                    | —        | —                    |
| 5.0         | 9.3E-9    | 5.38E8           | 5.83E-6 | 8.60E5               | —        | —                    | —                | —                    | —        | —                    | —        | —                    |
